# Supplementary material for: The Spectroscopic Characterization of Halogenated Pollutants through the Interplay between Theory and Experiment: Application to R1122
Source: MDPI journal article supplement (doi:10.3390/molecules27030748), 2022-01-24
Supplement: s1 [file s1]

# Supplementary Materials: The spectroscopic characterization of halogenated pollutants through the interplay between theory and experiment: application to R1122

Andrea Pietropolli Charmet <sup>1,\*</sup> , Giorgia Ceselin <sup>2</sup> , Paolo Stoppa <sup>1</sup>  and Nicola Tasinato <sup>2,\*</sup> 

## 1. List of supporting information available

Table S1. Theoretical equilibrium geometry.

Table S2. Theoretical rotational spectroscopic parameters of <sup>35</sup>CIHC=CF<sub>2</sub>.

Table S3. Theoretical rotational spectroscopic parameters of <sup>37</sup>CIHC=CF<sub>2</sub>.

Table S4. Theoretical rotational spectroscopic parameters of CIHC=<sup>13</sup>CF<sub>2</sub>.

Table S5. Theoretical rotational spectroscopic parameters of CIH<sup>13</sup>C=CF<sub>2</sub>.

Table S6. Theoretical rotational spectroscopic parameters of <sup>35</sup>CIDC=CF<sub>2</sub>.

Table S7. Theoretical rotational spectroscopic parameters of <sup>37</sup>CIDC=CF<sub>2</sub>.

Table S8. Harmonic and anharmonic wavenumbers and intensities of <sup>35</sup>CIHC=CF<sub>2</sub> fundamental vibrations at B2PLYP/jun-cc-pV(T+d)Z level.

Table S9. Harmonic and anharmonic wavenumbers and intensities of <sup>35</sup>CIHC=CF<sub>2</sub> fundamental vibrations at B3LYP/SNSD level.

Table S10. Harmonic and anharmonic wavenumbers and intensities of <sup>35</sup>CIHC=CF<sub>2</sub> fundamental vibrations at rev-DSDPW6B95/jun-cc-pV(T+d)Z level.

Table S11. Harmonic and anharmonic wavenumbers and intensities of <sup>35</sup>CIHC=CF<sub>2</sub> fundamental vibrations at PW6B95/jul-cc-pV(T+d)Z level.

Table S12. Theoretical and experimental anharmonic constants of <sup>35</sup>CIHC=CF<sub>2</sub>.

Table S13. Comparison among the fundamentals (cm<sup>-1</sup>) of R1122 and similar halogenated ethenes.

Figure S1. Differences between theoretical and experimental wavenumbers for <sup>35</sup>CIHC=CF<sub>2</sub> fundamental transitions.

Table S1: Theoretical equilibrium geometry of ClHC=CF<sub>2</sub>.<sup>a</sup>

| parameter          | CCSD(T) <sup>b</sup> | rDSD <sup>c</sup> | B2PLYP <sup>d</sup> | PW6B95 <sup>e</sup> | B3LYP <sup>f</sup> |
|--------------------|----------------------|-------------------|---------------------|---------------------|--------------------|
| <i>r</i> (C2–H1)   | 1.0764               | 1.0774            | 1.0748              | 1.0820              | 1.0802             |
| <i>r</i> (C2=C3)   | 1.3292               | 1.3258            | 1.3230              | 1.3233              | 1.3266             |
| <i>r</i> (C3–F4)   | 1.3177               | 1.3180            | 1.3198              | 1.3208              | 1.3254             |
| <i>r</i> (C2–Cl5)  | 1.7246               | 1.7160            | 1.7172              | 1.7112              | 1.7365             |
| <i>r</i> (C3–F6)   | 1.3114               | 1.3111            | 1.3127              | 1.3140              | 1.3177             |
| $\alpha$ (C3C2H1)  | 120.32               | 120.29            | 120.33              | 120.46              | 120.95             |
| $\alpha$ (C2C3F4)  | 123.06               | 123.19            | 123.20              | 123.30              | 123.03             |
| $\alpha$ (C3C2Cl5) | 121.90               | 121.94            | 122.13              | 122.03              | 122.19             |
| $\alpha$ (C2C3F6)  | 125.73               | 125.77            | 125.83              | 125.81              | 125.92             |

<sup>a</sup> Bond lengths and angles in Å and °, respectively.<sup>b</sup> CCSD(T)/cc-pVTZ<sup>c</sup> rev-DSDPBEP86/jun-cc-pV(T+d)Z.<sup>d</sup> B2PLYP/jun-cc-pV(T+d)Z.<sup>e</sup> PW6B95/jul-cc-pV(D+d)Z.<sup>f</sup> B3LYP/SNSD.

Table S2: Equilibrium ( $B_e^\alpha$ ) and ground state ( $B_0^\alpha$ ) rotational-, centrifugal distortion-, nuclear quadrupolar coupling constants of  $^{35}\text{ClHC}=\text{CF}_2$ .<sup>a</sup>

|                         | PW6B95 <sup>b</sup> | rDSD <sup>c</sup> | B2PLYP <sup>d</sup> | B3LYP <sup>e</sup> | Exp. <sup>f</sup> |
|-------------------------|---------------------|-------------------|---------------------|--------------------|-------------------|
| $A_e$                   | 10693.117           | 10714.792         | 10705.289           | 10607.437          | -                 |
| $B_e$                   | 2288.825            | 2285.138          | 2281.690            | 2250.482           | -                 |
| $C_e$                   | 1885.275            | 1882.476          | 1880.808            | 1856.585           | -                 |
| $A_0$                   | 10637.626           | 10656.782         | 10647.339           | 10552.604          | 10710.73661(64)   |
| $B_0$                   | 2282.050            | 2277.883          | 2274.375            | 2243.407           | 2297.18720(14)    |
| $C_0$                   | 1877.510            | 1875.352          | 1872.684            | 1848.760           | 1890.14644(15)    |
| $\Delta_J$              | 0.355               | 0.339             | 0.338               | 0.330              | 0.348727(26)      |
| $\Delta_{JK}$           | 4.44                | 4.08              | 4.06                | 3.99               | 4.07532(51)       |
| $\Delta_K$              | 7.61                | 7.69              | 7.75                | 7.80               | 7.8803(52)        |
| $\delta_J$              | 0.0604              | 0.0579            | 0.0577              | 0.0563             | 0.059845(8)       |
| $\delta_K$              | 2.73                | 2.54              | 2.54                | 2.50               | 2.6008(14)        |
| $\Phi_J \times 10^5$    | 7.63                | 6.03              | 6.15                | 6.24               | -                 |
| $\Phi_{JK} \times 10^3$ | 5.62                | 4.01              | 4.18                | 4.27               | -                 |
| $\Phi_{KJ}$             | -0.0355             | -0.0308           | -0.0305             | -0.0299            | -0.0278(24)       |
| $\Phi_K$                | 0.0607              | 0.0558            | 0.0554              | 0.0549             | 0.067(15)         |
| $\phi_J \times 10^5$    | 2.00                | 1.73              | 1.75                | 1.76               | -                 |
| $\phi_{JK} \times 10^3$ | 2.65                | 1.91              | 2.00                | 2.05               | 2.25(39)          |
| $\Phi_K$                | 0.103               | 0.0876            | 0.0879              | 0.0872             | -                 |
| $\chi_{aa}$             | -51.0               | -51.8             | -52.4               | -55.3              | -54.7502(91)      |
| $\chi_{bb}$             | 17.7                | 17.4              | 18.1                | 18.9               | 18.0921(88)       |
| $\chi_{cc}$             | 33.3                | 34.3              | 34.3                | 36.4               | 36.658(10)        |
| $ \chi_{ab} $           | 43.0                | 43.5              | 43.8                | 45.4               | 46.62(31)         |

<sup>a</sup> Rotational parameters within the Watson's A-reduction Hamiltonian in the  $I^r$  representation. Rotational and nuclear quadrupolar coupling constants in MHz; centrifugal distortion parameters in kHz.

<sup>b</sup> PW6B95/jul-cc-pV(D+d)Z.

<sup>c</sup> rev-DSDPBEP86/jun-cc-pV(T+d)Z.

<sup>d</sup> B2PLYP/jun-cc-pV(T+d)Z.

<sup>e</sup> B3LYP/SNSD.

<sup>f</sup> Rotational- and centrifugal distortion constants from Ref. [1]; nuclear quadrupolar coupling constants from Ref. [2].

Table S3: Equilibrium ( $B_e^a$ ) and ground state ( $B_0^a$ ) rotational constants, centrifugal distortion-, nuclear quadrupolar coupling constants of  $^{37}\text{ClHC}=\text{CF}_2$  and comparison to experimental values.<sup>a</sup>

|                         | ChS <sup>b</sup> | PW6B95 <sup>c</sup> | rDSD <sup>d</sup> | B2PLYP <sup>e</sup> | B3LYP <sup>f</sup> | Exp. <sup>g</sup> |
|-------------------------|------------------|---------------------|-------------------|---------------------|--------------------|-------------------|
| $A_e$                   | 10781.801        | 10693.117           | 10714.762         | 10705.289           | 10607.437          | -                 |
| $B_e$                   | 2240.245         | 2224.100            | 2220.473          | 2217.085            | 2186.626           | -                 |
| $C_e$                   | 1854.845         | 1841.145            | 1839.317          | 1836.708            | 1812.905           | -                 |
| $A_0$                   | 10723.791        | 10637.626           | 10656.752         | 10647.279           | 10552.605          | 10710.7013(16)    |
| $B_0$                   | 2233.230         | 2217.535            | 2213.458          | 2210.040            | 2179.821           | 2232.28022(67)    |
| $C_0$                   | 1846.991         | 1833.621            | 1831.462          | 1828.824            | 1805.350           | 1845.97825(49)    |
| $\Delta_J$              | 0.336            | 0.341               | 0.326             | 0.324               | 0.317              | 0.307(12)         |
| $\Delta_{JK}$           | 4.03             | 4.29                | 3.94              | 3.92                | 3.85               | 3.66(11)          |
| $\Delta_K$              | 7.99             | 7.78                | 7.84              | 7.90                | 7.95               | 8.62(15)          |
| $\delta_J$              | 0.0560           | 0.0567              | 0.0543            | 0.0541              | 0.0528             | 0.0575(11)        |
| $\delta_K$              | 2.51             | 2.64                | 2.45              | 2.45                | 2.41               | 2.03(13)          |
| $\Phi_J \times 10^5$    | 5.95             | 7.20                | 5.66              | 5.78                | 5.86               | -                 |
| $\Phi_{JK} \times 10^3$ | 2.75             | 5.26                | 3.74              | 3.90                | 3.99               | -                 |
| $\Phi_{KJ}$             | -0.0228          | -0.0343             | -0.0298           | -0.0295             | -0.0288            | -                 |
| $\Phi_K$                | 0.0358           | 0.0599              | 0.0551            | 0.0547              | 0.0542             | -                 |
| $\phi_J \times 10^5$    | 1.88             | 1.85                | 1.59              | 1.61                | 1.62               | -                 |
| $\phi_{JK} \times 10^3$ | 1.34             | 2.47                | 1.77              | 1.86                | 1.91               | -                 |
| $\Phi_K$                | 0.061            | 0.101               | 0.086             | 0.087               | 0.086              | -                 |
| $\chi_{aa}$             | -43.28           | -40.2               | -40.8             | -41.3               | -43.6              | -43.2687(56)      |
| $\chi_{bb}$             | 14.33            | 13.9                | 13.7              | 14.3                | 14.9               | 14.3688(66)       |
| $\chi_{cc}$             | 28.95            | 26.3                | 27.1              | 27.1                | 28.7               | 28.8999(63)       |
| $ \chi_{ab} $           | 36.63            | 33.8                | 34.3              | 34.6                | 35.9               | 36.77(50)         |

<sup>a</sup> Rotational parameters within the Watson's A-reduction Hamiltonian in the  $I^r$  representation. Rotational- and nuclear quadrupolar coupling constants in MHz; centrifugal distortion parameters in kHz

<sup>b</sup> Equilibrium rotational constants from ChS geometry; ground state rotational constants from ChS equilibrium rotational constants and rev-DSDPBEP86/jun-cc-pV(T+d)Z vibrational contributions; quartic centrifugal distortion constants from ChS; sextic centrifugal distortion parameters at CCSD(T)/cc-pVTZ level; nuclear quadrupolar coupling constants at a.e.-MP2/cc-pwCVTZ level.

<sup>c</sup> PW6B95/jul-cc-pV(D+d)Z.

<sup>d</sup> rev-DSDPBEP86/jun-cc-pV(T+d)Z.

<sup>e</sup> B2PLYP/jun-cc-pV(T+d)Z.

<sup>f</sup> B3LYP/SNSD.

<sup>g</sup> From Ref. [2].

Table S4: Equilibrium ( $B_e^a$ ) and ground state ( $B_0^a$ ) rotational constants, centrifugal distortion-, nuclear quadrupolar coupling constants of  $^{35}\text{ClHC}=\text{}^{13}\text{CF}_2$  and comparison to experimental values.<sup>a</sup>

|                         | ChS <sup>b</sup> | PW6B95 <sup>c</sup> | rDSD <sup>d</sup> | Exp. <sup>e</sup> |
|-------------------------|------------------|---------------------|-------------------|-------------------|
| $A_e$                   | 10780.705        | 10692.098           | 10713.773         | -                 |
| $B_e$                   | 2297.970         | 2281.451            | 2277.733          | -                 |
| $C_e$                   | 1894.211         | 1880.238            | 1878.380          | -                 |
| $A_0$                   | 10723.934        | 10637.656           | 10656.902         | 10710.8809(44)    |
| $B_0$                   | 2290.864         | 2274.825            | 2270.628          | 2289.8665(18)     |
| $C_0$                   | 1886.297         | 1872.624            | 1870.465          | 1885.19031(94)    |
| $\Delta_J$              | 0.329            | 0.352               | 0.337             | 0.403(48)         |
| $\Delta_{JK}$           | 3.79             | 4.44                | 4.07              | 5.60(61)          |
| $\Delta_K$              | 8.08             | 7.59                | 7.67              | 8.17              |
| $\delta_J$              | 0.0549           | 0.0599              | 0.0574            | 0.0567(39)        |
| $\delta_K$              | 2.39             | 2.73                | 2.54              | 2.418             |
| $\Phi_J \times 10^5$    | 6.42             | 7.56                | 5.99              | -                 |
| $\Phi_{JK} \times 10^3$ | 4.03             | 5.58                | 3.98              | -                 |
| $\Phi_{KJ}$             | -0.0316          | -0.0356             | -0.0310           | -                 |
| $\Phi_K$                | 0.0555           | 0.0604              | 0.0556            | -                 |
| $\phi_J \times 10^5$    | 1.84             | 1.98                | 1.72              | -                 |
| $\phi_{JK} \times 10^3$ | 1.95             | 2.64                | 1.90              | -                 |
| $\Phi_K$                | 0.0872           | 0.103               | 0.0878            | -                 |
| $\chi_{aa}$             | -54.93           | -51.0               | -51.8             | -54.9162(87)      |
| $\chi_{bb}$             | 18.19            | 17.5                | 17.5              | 18.2683(87)       |
| $\chi_{cc}$             | 36.73            | 33.3                | 34.3              | 36.6479(92)       |
| $ \chi_{ab} $           | 46.24            | 42.9                | 43.4              | 45.96(39)         |

<sup>a</sup> Rotational parameters within the Watson's A-reduction Hamiltonian in the  $I^r$  representation. Rotational- and nuclear quadrupolar coupling constants in MHz; centrifugal distortion parameters in kHz

<sup>b</sup> Equilibrium rotational constants from ChS geometry; ground state rotational constants from ChS equilibrium rotational constants and rev-DSDPBEP86/jun-cc-pV(T+d)Z vibrational contributions; quartic centrifugal distortion constants from ChS; sextic centrifugal distortion parameters at CCSD(T)/cc-pVTZ level; nuclear quadrupolar coupling constants at a.e.-MP2/cc-pwCVTZ level.

<sup>c</sup> PW6B95/jul-cc-pV(D+d)Z.

<sup>d</sup> rev-DSDPBEP86/jun-cc-pV(T+d)Z.

<sup>e</sup> From Ref. [2].

Table S5: Equilibrium ( $B_e^a$ ) and ground state ( $B_0^a$ ) rotational constants, centrifugal distortion-, nuclear quadrupolar coupling constants of  $^{35}\text{ClH}^{13}\text{C}=\text{CF}_2$  and comparison to experimental values.<sup>a</sup>

|                         | ChS <sup>b</sup> | PW6B95 <sup>c</sup> | rDSD <sup>d</sup> | Exp. <sup>e</sup> |
|-------------------------|------------------|---------------------|-------------------|-------------------|
| $A_e$                   | 10650.931        | 10565.286           | 10585.762         | -                 |
| $B_e$                   | 2304.658         | 2288.016            | 2284.359          | -                 |
| $C_e$                   | 1894.684         | 1880.718            | 1878.889          | -                 |
| $A_0$                   | 10592.981        | 10509.824           | 10527.812         | 10579.6945(51)    |
| $B_0$                   | 2297.523         | 2281.331            | 2277.224          | 2296.5052(21)     |
| $C_0$                   | 1886.680         | 1873.013            | 1870.885          | 1885.5650(10)     |
| $\Delta_J$              | 0.329            | 0.352               | 0.337             | 0.348(54)         |
| $\Delta_{JK}$           | 3.58             | 4.19                | 3.85              | 4.38(66)          |
| $\Delta_K$              | 7.60             | 7.10                | 7.20              | 8.9(11)           |
| $\delta_J$              | 0.0565           | 0.0617              | 0.0591            | 0.0711(39)        |
| $\delta_K$              | 2.35             | 2.67                | 2.49              | 2.418             |
| $\Phi_J \times 10^5$    | 6.39             | 7.52                | 5.95              | -                 |
| $\Phi_{JK} \times 10^3$ | 3.80             | 5.28                | 3.75              | -                 |
| $\Phi_{KJ}$             | -0.0302          | -0.0343             | -0.0295           | -                 |
| $\Phi_K$                | 0.0511           | 0.0556              | 0.0509            | -                 |
| $\phi_J \times 10^5$    | 1.91             | 2.07                | 1.79              | -                 |
| $\phi_{JK} \times 10^3$ | 1.84             | 2.51                | 1.80              | -                 |
| $\Phi_K$                | 0.0825           | 0.0972              | 0.0832            | -                 |
| $\chi_{aa}$             | -54.79           | -50.9               | -51.8             | -54.7502(91)      |
| $\chi_{bb}$             | 18.05            | 17.6                | 17.4              | 18.0921(88)       |
| $\chi_{cc}$             | 36.73            | 33.3                | 34.3              | 36.658(10)        |
| $ \chi_{ab} $           | 46.3             | 43.0                | 43.4              | 46.62(31)         |

<sup>a</sup> Rotational parameters within the Watson's A-reduction Hamiltonian in the  $I^r$  representation. Rotational- and nuclear quadrupolar coupling constants in MHz; centrifugal distortion parameters in kHz

<sup>b</sup> Equilibrium rotational constants from ChS geometry; ground state rotational constants from ChS equilibrium rotational constants and rev-DSDPBEP86/jun-cc-pV(T+d)Z vibrational contributions; quartic centrifugal distortion constants from ChS; sextic centrifugal distortion parameters at CCSD(T)/cc-pVTZ level; nuclear quadrupolar coupling constants at a.e.-MP2/cc-pwCVTZ level.

<sup>c</sup> PW6B95/jul-cc-pV(D+d)Z.

<sup>d</sup> rev-DSDPBEP86/jun-cc-pV(T+d)Z.

<sup>e</sup> From Ref. [2].

Table S6: Equilibrium ( $B_e^a$ ) and ground state ( $B_0^a$ ) rotational constants, centrifugal distortion-, nuclear quadrupolar coupling constants of  $^{35}\text{ClDC}=\text{CF}_2$  and comparison to experimental values<sup>a</sup>.

|                          | ChS <sup>b</sup> | PW6B95 <sup>c</sup> | rDSD <sup>d</sup> | Exp. <sup>e</sup> |
|--------------------------|------------------|---------------------|-------------------|-------------------|
| $A_e$                    | 10061.314        | 9980.661            | 10001.466         | -                 |
| $B_e$                    | 2304.786         | 2288.106            | 2284.478          | -                 |
| $C_e$                    | 1875.222         | 1861.381            | 1859.703          | -                 |
| $A_0$                    | 10006.392        | 9928.467            | 9946.544          | 9993.72067(32)    |
| $B_0$                    | 2296.812         | 2280.611            | 2276.504          | 2295.74786(22)    |
| $C_0$                    | 1866.737         | 1853.257            | 1851.218          | 1865.60899(19)    |
| $\Delta_J$               | 0.323            | 0.346               | 0.331             | 0.3318(26)        |
| $\Delta_{JK}$            | 2.898            | 3.38                | 3.11              | 3.182(27)         |
| $\Delta_K$               | 5.918            | 5.48                | 5.59              | 5.678(29)         |
| $\delta_J$               | 0.0595           | 0.0650              | 0.0622            | 0.06381(42)       |
| $\delta_K$               | 2.07             | 2.35                | 2.19              | 1.866(83)         |
| $\Phi_J \times 10^5$     | 6.22             | 7.54                | 6.04              | -                 |
| $\Phi_{JK} \times 10^3$  | 2.93             | 4.12                | 2.91              | -                 |
| $\Phi_{KJ}$              | -0.0233          | -0.0271             | -0.0232           | -                 |
| $\Phi_K$                 | 0.0361           | 0.0397              | 0.0363            | -                 |
| $\phi_J \times 10^5$     | 2.00             | 2.26                | 1.95              | -                 |
| $\phi_{JK} \times 10^3$  | 1.42             | 1.97                | 1.40              | -                 |
| $\Phi_K$                 | 0.0614           | 0.0718              | 0.0617            | -                 |
| $\chi_{aa}(\text{Cl})$   | -54.72           | -50.8               | -51.6             | -54.7054(10)      |
| $\chi_{bb}(\text{Cl})$   | 18.02            | 17.5                | 17.3              | 18.0667(13)       |
| $\chi_{cc}(\text{Cl})$   | 36.70            | 33.3                | 34.3              | 36.6387(11)       |
| $ \chi_{ab} (\text{Cl})$ | 46.33            | 43.1                | 43.6              | 46.860(13)        |
| $\chi_{aa}(\text{D})$    | -0.089           | -0.092              | -0.088            | -0.0857(27)       |
| $\chi_{bb}(\text{D})$    | 0.200            | 0.204               | 0.197             | 0.1925(19)        |
| $\chi_{cc}(\text{D})$    | -0.111           | -0.112              | -0.109            | -0.1069(14)       |
| $ \chi_{ab} (\text{D})$  | 0.007            | 0.003               | 0.004             | -                 |

<sup>a</sup> Rotational parameters within the Watson's A-reduction Hamiltonian in the  $I^r$  representation. Rotational- and nuclear quadrupolar coupling constants in MHz; centrifugal distortion parameters in kHz

<sup>b</sup> Equilibrium rotational constants from ChS geometry; ground state rotational constants from ChS equilibrium rotational constants and rev-DSDPBEP86/jun-cc-pV(T+d)Z vibrational contributions; quartic centrifugal distortion constants from ChS; sextic centrifugal distortion parameters at CCSD(T)/cc-pVTZ level; nuclear quadrupolar coupling constants at a.e.-MP2/cc-pwCVTZ level.

<sup>c</sup> PW6B95/jul-cc-pV(D+d)Z.

<sup>d</sup> rev-DSDPBEP86/jun-cc-pV(T+d)Z.

<sup>e</sup> From Ref. [2].

Table S7: Equilibrium ( $B_e^a$ ) and ground state ( $B_0^a$ ) rotational constants, centrifugal distortion-, nuclear quadrupolar coupling constants of  $^{37}\text{ClDC}=\text{CF}_2$ .<sup>a</sup>

|                          | ChS <sup>b</sup> | PW6B95 <sup>c</sup> | rDSD <sup>c</sup> | Exp. <sup>d</sup> |
|--------------------------|------------------|---------------------|-------------------|-------------------|
| $A_e$                    | 10061.033        | 9980.391            | 10001.166         | -                 |
| $B_e$                    | 2239.781         | 2223.621            | 2220.023          | -                 |
| $C_e$                    | 1831.953         | 1818.451            | 1816.742          | -                 |
| $A_0$                    | 10006.201        | 9928.167            | 9946.334          | 9993.40899(37)    |
| $B_0$                    | 2232.077         | 2216.336            | 2212.318          | 2231.06858(11)    |
| $C_0$                    | 1823.739         | 1810.567            | 1808.528          | 1822.654138(90)   |
| $\Delta_J$               | 0.328            | 0.332               | 0.318             | 0.3194(21)        |
| $\Delta_{JK}$            | 3.08             | 3.27                | 3.01              | 3.000(18)         |
| $\Delta_K$               | 5.80             | 5.61                | 5.70              | 5.728(61)         |
| $\delta_J$               | 0.0602           | 0.0611              | 0.0584            | 0.06091(41)       |
| $\delta_K$               | 2.165            | 2.27                | 2.12              | 1.866             |
| $\Phi_J \times 10^5$     | 5.96             | 7.10                | 5.65              | -                 |
| $\Phi_{JK} \times 10^3$  | 2.75             | 3.86                | 2.72              | -                 |
| $\Phi_{KJ}$              | -0.0228          | -0.0263             | -0.0225           | -                 |
| $\Phi_K$                 | 0.0358           | 0.0391              | 0.0358            | -                 |
| $\phi_J \times 10^5$     | 1.88             | 2.09                | 1.79              | -                 |
| $\phi_{JK} \times 10^3$  | 1.34             | 1.84                | 1.30              | -                 |
| $\Phi_K$                 | 0.0606           | 0.0710              | 0.0610            | -                 |
| $\chi_{aa}(\text{Cl})$   | -43.17           | -40.1               | -40.7             | -43.1558(11)      |
| $\chi_{bb}(\text{Cl})$   | 14.24            | 13.9                | 13.7              | 14.2807(12)       |
| $\chi_{cc}(\text{Cl})$   | 28.93            | 26.2                | 27.0              | 28.8751(11)       |
| $ \chi_{ab} (\text{Cl})$ | 36.49            | 33.9                | 34.3              | 36.898(12)        |
| $\chi_{aa}(\text{D})$    | -0.089           | -0.092              | -0.087            | -0.0852(27)       |
| $\chi_{bb}(\text{D})$    | 0.200            | 0.204               | 0.197             | 0.1923(19)        |
| $\chi_{cc}(\text{D})$    | -0.111           | -0.112              | -0.109            | -0.1071(11)       |
| $ \chi_{ab} (\text{D})$  | 0.007            | 0.003               | 0.004             | -                 |

<sup>a</sup> Rotational parameters within the Watson's A-reduction Hamiltonian in the  $I'$  representation. Rotational- and nuclear quadrupolar coupling constants in MHz; centrifugal distortion parameters in kHz

<sup>b</sup> Equilibrium rotational constants from ChS geometry; ground state rotational constants from ChS equilibrium rotational constants and rev-DSDPBEP86/jun-cc-pV(T+d)Z vibrational contributions; quartic centrifugal distortion constants from ChS; sextic centrifugal distortion parameters at CCSD(T)/cc-pVTZ level; nuclear quadrupolar coupling constants at a.e.-MP2/cc-pwCVTZ level.

<sup>c</sup> PW6B95/jul-cc-pV(D+d)Z.

<sup>d</sup> rev-DSDPBEP86/jun-cc-pV(T+d)Z.

<sup>e</sup> From Ref. [2].



Table S8: Harmonic and anharmonic wavenumbers ( $\text{cm}^{-1}$ ) and intensities ( $\text{km mol}^{-1}$ ) of  $^{35}\text{ClHC}=\text{CF}_2$  fundamental vibrations at B2PLYP/jun-cc-pV(T+d)Z level of theory.

| Normal mode | $\omega$ | $I^{\text{harm}}$ | $\nu$ | $I^{\text{anharm}}$ |
|-------------|----------|-------------------|-------|---------------------|
| 1           | 3271     | 16.12             | 3145  | 13.75               |
| 2           | 1780     | 188.59            | 1743  | 156.90              |
| 3           | 1350     | 103.28            | 1317  | 89.82               |
| 4           | 1219     | 146.27            | 1195  | 140.05              |
| 5           | 987      | 125.0             | 969   | 118.42              |
| 6           | 850      | 10.14             | 838   | 7.87                |
| 7           | 581      | 2.86              | 576   | 2.80                |
| 8           | 435      | 1.30              | 430   | 1.21                |
| 9           | 196      | 1.88              | 195   | 1.93                |
| 10          | 778      | 37.60             | 761   | 36.30               |
| 11          | 604      | 0.39              | 592   | 0.36                |
| 12          | 239      | 0.56              | 236   | 0.59                |

Table S9: Harmonic and anharmonic wavenumbers ( $\text{cm}^{-1}$ ) and intensities ( $\text{km mol}^{-1}$ ) of  $^{35}\text{ClHC}=\text{CF}_2$  fundamental vibrations at B3LYP/SNSD level of theory.

| Normal mode | $\omega$ | $I^{\text{harm}}$ | $\nu$ | $I^{\text{anharm}}$ |
|-------------|----------|-------------------|-------|---------------------|
| 1           | 3256     | 16.92             | 3128  | 14.52               |
| 2           | 1783     | 183.31            | 1749  | 135.06              |
| 3           | 1329     | 103.85            | 1298  | 90.10               |
| 4           | 1201     | 151.75            | 1177  | 143.85              |
| 5           | 976      | 133.46            | 958   | 121.87              |
| 6           | 837      | 13.25             | 825   | 12.42               |
| 7           | 572      | 2.89              | 567   | 2.84                |
| 8           | 429      | 1.20              | 423   | 1.11                |
| 9           | 195      | 2.01              | 194   | 2.02                |
| 10          | 764      | 38.68             | 747   | 37.27               |
| 11          | 592      | 0.39              | 582   | 0.36                |
| 12          | 235      | 0.64              | 233   | 0.66                |

Table S10: Harmonic and anharmonic wavenumbers ( $\text{cm}^{-1}$ ) and intensities ( $\text{km mol}^{-1}$ ) of  $^{35}\text{ClHC}=\text{CF}_2$  fundamental vibrations at revDSD/jun-cc-pV(T+d)Z level of theory.

| Normal mode | $\omega$ | $I^{\text{harm}}$ | $\nu$ | $I^{\text{anharm}}$ |
|-------------|----------|-------------------|-------|---------------------|
| 1           | 3268     | 15.64             | 3143  | 13.35               |
| 2           | 1789     | 185.47            | 1752  | 151.60              |
| 3           | 1362     | 114.04            | 1328  | 93.26               |
| 4           | 1225     | 134.28            | 1201  | 126.46              |
| 5           | 993      | 119.75            | 974   | 110.50              |
| 6           | 856      | 9.053             | 844   | 8.43                |
| 7           | 583      | 2.96              | 577   | 2.89                |
| 8           | 437      | 1.39              | 431   | 1.30                |
| 9           | 196      | 1.89              | 195   | 1.92                |
| 10          | 776      | 37.21             | 759   | 35.93               |
| 11          | 606      | 0.52              | 595   | 0.49                |
| 12          | 240      | 0.54              | 238   | 0.57                |

Table S11: Harmonic and anharmonic wavenumbers ( $\text{cm}^{-1}$ ) and intensities ( $\text{km mol}^{-1}$ ) of  $^{35}\text{ClHC}=\text{CF}_2$  fundamental vibrations at PW6B95-D3/jul-cc-pV(D+d)Z level of theory.

| Normal mode | $\omega$ | $I^{\text{harm}}$ | $\nu$ | $I^{\text{anharm}}$ |
|-------------|----------|-------------------|-------|---------------------|
| 1           | 3286     | 17.60             | 3161  | 15.06               |
| 2           | 1821     | 187.02            | 1786  | 161.76              |
| 3           | 1347     | 128.80            | 1321  | 110.61              |
| 4           | 1206     | 128.53            | 1192  | 122.99              |
| 5           | 991      | 129.69            | 975   | 119.70              |
| 6           | 858      | 10.26             | 846   | 8.61                |
| 7           | 575      | 2.78              | 570   | 2.72                |
| 8           | 434      | 1.57              | 430   | 1.48                |
| 9           | 188      | 1.98              | 196   | 1.99                |
| 10          | 781      | 37.68             | 762   | 36.64               |
| 11          | 604      | 0.36              | 594   | 0.43                |
| 12          | 241      | 0.70              | 237   | 0.65                |

Table S12: Theoretical and experimental anharmonic constants ( $\text{cm}^{-1}$ ) of  $^{35}\text{ClHC}=\text{CF}_2$ <sup>a</sup>

| i/j | 1                 | 2                 | 3                 | 4               | 5               | 6               | 7               | 8              | 9              | 10              | 11   | 12  |
|-----|-------------------|-------------------|-------------------|-----------------|-----------------|-----------------|-----------------|----------------|----------------|-----------------|------|-----|
| 1   | -56.6<br>-60.8(6) |                   |                   |                 |                 |                 |                 |                |                |                 |      |     |
| 2   | 5.8<br>1.4(5)     | -7.3<br>-6.2(1)   |                   |                 |                 |                 |                 |                |                |                 |      |     |
| 3   | -2.9<br>-6.5(6)   | -11.9<br>-14.3(4) | -3.8<br>-9.9(3)   |                 |                 |                 |                 |                |                |                 |      |     |
| 4   | -6.9<br>-8.8(3)   | -9.8<br>-10.0(3)  | -10.3<br>-19.6(4) | -3.6<br>-3.4(1) |                 |                 |                 |                |                |                 |      |     |
| 5   | -2.2<br>-7.6(2)   | -6.8<br>-6.2(6)   | -5.9<br>1.3(3)    | -3.1<br>-2.9(6) | -1.6<br>-1.6(3) |                 |                 |                |                |                 |      |     |
| 6   | -2.0<br>-8.7(5)   | 3.0<br>6.8(3)     | -2.7              | -1.5            | -2.2<br>-2.5(6) | -3.5<br>-3.4(1) |                 |                |                |                 |      |     |
| 7   | -0.1<br>-2.0(5)   | -3.2<br>-1.9(3)   | -5.0              | -0.8<br>-1.2(5) | -2.9<br>-9.4(1) | -0.3            | -0.1<br>-1.5(3) |                |                |                 |      |     |
| 8   | 0.3<br>-1.5(5)    | -2.3              | -1.6              | -2.0            | -1.0<br>-3.8(4) | -3.3<br>-3.0(4) | 0.3<br>-2.3(3)  | 0.4            |                |                 |      |     |
| 9   | -0.2              | -1.1              | -1.7              | 1.3             | -0.6            | -1.4            | 0.1             | -0.1           | 0.4            |                 |      |     |
| 10  | -15.5             | -7.8              | 3.3               | 1.5             | -4.2            | -1.7            | 0.0             | 0.2            | 0.3<br>-3.2(3) | -2.4<br>-2.0(1) |      |     |
| 11  | -1.3              | -9.1              | -1.5              | -2.4            | -2.4            | -0.5            | 0.0             | -0.3           | -0.1           | -2.7            | -0.3 |     |
| 12  | -0.1              | -1.6<br>-0.6(5)   | -0.5              | -0.4<br>-1.1(5) | -3.6            | -0.3            | 0.5             | -3.5<br>1.4(5) | 0.4            | 2.6<br>1.4(6)   | -0.5 | 0.6 |

<sup>a</sup>  $x_{ij}$  anharmonic constants from deperturbed CC5Z:rDSD hybrid force field (top entry) and determined experimentally (bottom entry).  $x_{ij} = x_{ji}$ .

Table S13: Comparison among the fundamentals ( $\text{cm}^{-1}$ ) of R1122 and analogous halogenated ethenes.

| Fundamental <sup>a</sup> | ClHC=CH <sub>2</sub> <sup>b</sup> | <i>trans</i> -ClFE <sup>c</sup> | <i>cis</i> -ClFE <sup>d</sup> | R1122 <sup>e</sup> | R1113 <sup>f</sup> | FHC=CH <sub>2</sub> <sup>g</sup> |
|--------------------------|-----------------------------------|---------------------------------|-------------------------------|--------------------|--------------------|----------------------------------|
| $\nu_1$                  | 3129                              | 3103                            | 3114                          | 3135.9             | 1800.6             | 3140.7                           |
| $\nu_2$                  | 3090                              | 3094                            | 3102                          | 1747.5             | 1334.4             | 3094.5                           |
| $\nu_3$                  | 3040                              | 1647                            | 1661                          | 1341.7             | 1216.2             | 3062.1                           |
| $\nu_4$                  | 1614                              | 1296                            | 1335                          | 1200.7             | 1059.7             | 1655.6                           |
| $\nu_5$                  | 1370.03                           | 1218                            | 1232                          | 971.5              | 691.4              | 1379.5                           |
| $\nu_6$                  | 1280.82                           | 1127                            | 1062                          | 844.9              | 516.2              | 1305.2                           |
| $\nu_7$                  | 1030.91                           | 876                             | 812                           | 578.0              | 462.3              | 1155.4                           |
| $\nu_8$                  | 720.21                            | 447                             | 656                           | 431.8              | 338                | 927.8                            |
| $\nu_9$                  | 395                               | 270                             | 200                           | 195 <sup>h</sup>   | 188                | 482.9                            |
| $\nu_{10}$               | 942.17                            | 888                             | 857                           | 751.1              | 538.7              | 929.1                            |
| $\nu_{11}$               | 896.57                            | 784                             | 735                           | 580 <sup>h</sup>   | 368                | 863.1                            |
| $\nu_{12}$               | 618.57                            | 270                             | 442                           | 235.3 <sup>i</sup> | 174                | 712.4                            |

<sup>a</sup> All the data listed in the present Table refer to <sup>35</sup>Cl isotopologues.<sup>b</sup> Experimental data taken from [3] and references therein.<sup>c</sup> *trans*-ClFE stands for *trans*-ClHC=CHF; experimental low resolution infrared data taken from [4], the corresponding theoretical analysis was then reported by Cazzoli *et al.* [5].<sup>d</sup> *cis*-ClFE stands for *cis*-ClHC=CHF; experimental low resolution infrared data taken from [4], the corresponding theoretical analysis was then reported by Gambi *et al.* [6].<sup>e</sup> R1122 experimental low resolution infrared data (present work).<sup>f</sup> R1113 stands for ClFC=CF<sub>2</sub>; experimental low resolution infrared data taken from [7].<sup>g</sup> Experimental data taken from [8].<sup>h</sup> R1122 best estimate theoretical prediction (present work).<sup>i</sup> R1122 estimated value from the analysis of infrared spectra (present work).

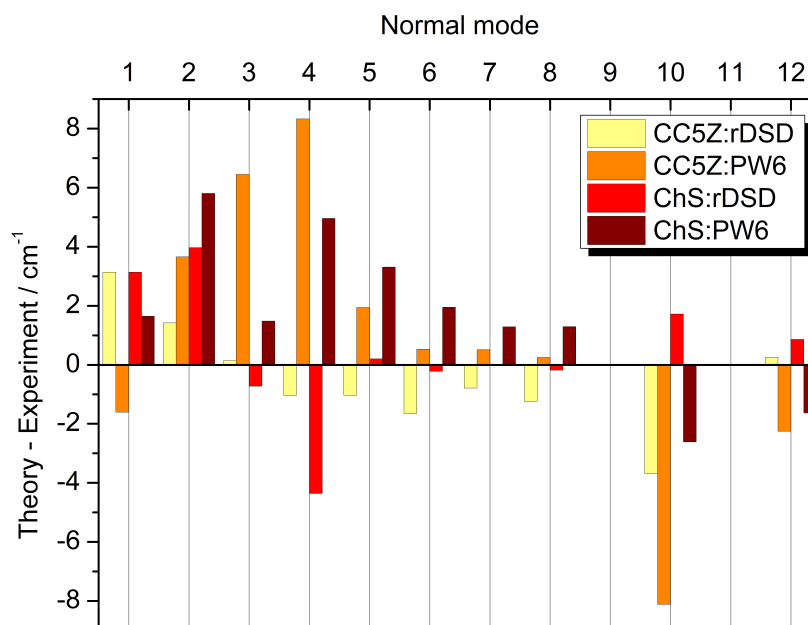

**Figure S1.** Difference between theoretical and experimental wavenumbers ( $\text{cm}^{-1}$  of  $^{35}\text{ClHC}=\text{CF}_2$  fundamental frequencies of vibration obtained from different hybrid force fields).

## References

1. Leal, L.A.; López, J.C.; Alonso, J.L.; Guarnieri, A. The Centimeter and Millimeter Microwave Spectrum of 1,1-Difluoro-2-Chloroethylene. *Z. Naturforsch.* **1993**, *48a*, 514–518. doi:10.1515/zna-1993-0311.
2. Leung, H.O.; Marshall, M.D.; Messinger, J.P.; Knowlton, G.S.; Sundheim, K.M.; Cheung-Lau, J.C. The microwave spectra and molecular structure of 2-chloro-1,1-difluoroethene and its complex with the argon atom. *J. Mol. Spectrosc.* **2014**, *305*, 25–33. doi:10.1016/j.jms.2014.09.011.
3. Demaison, J.; Møllendal, H.; Perrin, A.; Orphal, J.; Kwabia Tchana, F.; Rudolph, H.D.; Willaert, F. Microwave and high resolution infrared spectra of vinyl chloride, ab initio anharmonic force field and equilibrium structure. *J. Mol. Spectr.* **2005**, *232*, 174–185. doi:10.1016/j.jms.2005.04.006.
4. Craig, N.C.; Lo, Y.S.; Piper, L.G.; Wheeler, J.C. Vibrational assignments and potential constants for cis- and trans-1-chloro-2-fluoroethylenes and their deuterated modifications. *J. Phys. Chem.* **1970**, *74*, 1712–1727. doi:10.1021/j100703a011.
5. Cazzoli, G.; Puzzarini, C.; Gambi, A. Trans-1-chloro-2-fluoroethylene: Microwave spectra and anharmonic force field. *J. Chem. Phys.* **2004**, *120*, 6495–6501. doi:10.1063/1.1667461.
6. Gambi, A.; Puzzarini, C.; Cazzoli, G.; Dore, L.; Palmieri, P. The anharmonic force field of cis-1-chloro-2-fluoroethylene. *Mol. Phys.* **2002**, *100*, 3535–3543. doi:10.1080/00268970210130155.
7. Tasinato, N.; Pietropolli Charmet, A.; Stoppa, P.; Giorgianni, S.; Gambi, A. Quantum-chemical ab initio investigation of the vibrational spectrum of halon 1113 and its anharmonic force field: A joint experimental and computational approach. *Chem. Phys.* **2012**, *397*, 55–64. doi:10.1016/j.chemphys.2011.12.015.
8. Stoppa, P.; Pietropolli Charmet, A.; Tasinato, N.; Giorgianni, S.; Gambi, A. Infrared Spectra, Integrated Band Intensities, and Anharmonic Force Field of  $\text{H}_2\text{C}=\text{CHF}$ . *J. Phys. Chem. A* **2009**, *113*, 1497–1504. doi:10.1021/jp808556e.
